# Supplementary material for: Probiotics, prematurity and neurodevelopment: follow-up of a randomised trial
Source: PubMed Central journal article supplement — BMJ Paediatr Open. 2017 Nov 25;1(1):e000176. doi: 10.1136/bmjpo-2017-000176 (PMC5862156; doi:10.1136/bmjpo-2017-000176), 2017-11-25
Supplement: bmjpo-2017-000176supp001.pdf [file bmjpo-2017-000176supp001.pdf]

**Supplementary Table 1 Comparison of assessed and non-assessed surviving infants**

|                                               | Randomized All<br>(N= 1099) | Randomized Survivors<br>(N=1028) | Survivors Assessed<br>(N=664) | Survivors Not Assessed<br>(N=364) | Risk Difference | 95% Confidence Intervals | P value |
|-----------------------------------------------|-----------------------------|----------------------------------|-------------------------------|-----------------------------------|-----------------|--------------------------|---------|
| <b>Perinatal Characteristics</b>              |                             |                                  |                               |                                   |                 |                          |         |
| Multiple births, N (%)                        | 390 (35.5)                  | 371 (36.1)                       | 248 (37.3)                    | 123 (33.8)                        | 3.6             | -2.5, 9.7                | 0.26    |
| Antenatal steroids (any), N (%)               | 1002 (91.2)                 | 936 (91.1)                       | 610 (91.9)                    | 326 (89.6)                        | 2.3             | -1.5, 6.1                | 0.22    |
| Maternal antibiotics, N (%)                   | 532 (48.4)                  | 496 (48.2)                       | 320 (48.2)                    | 176 (48.4)                        | -0.2            | -6.5, 6.2                | 0.96    |
| Chorioamnionitis, N (%)                       | 95 (8.6)                    | 86 (8.4)                         | 53 (8.0)                      | 33 (9.1)                          | -1.1            | -4.7, 2.5                | 0.55    |
| Cesarean section delivery, N (%)              | 736 (67.0)                  | 693 (67.4)                       | 452 (68.1)                    | 241 (66.2)                        | 1.9             | -4.2, 7.9                | 0.54    |
| Gestational age, mean (SD) weeks              | 27.9 (2.0)                  | 28.0 (1.9)                       | 27.8 (1.9)                    | 28.4 (1.9)                        | -0.6            | -0.8, -0.3               | <0.005  |
| < 28 weeks, N (%)                             | 454 (41.3)                  | 394 (38.3)                       | 276 (41.6)                    | 118 (32.4)                        | 9.1             |                          | <0.005  |
| Birth weight, mean (SD) g                     | 1056 (260)                  | 1073 (253)                       | 1059 (257)                    | 1098 (246)                        | -38.9           | -70.8, -6.9              | 0.02    |
| < 1000g, N (%)                                | 474 (43.1)                  | 416 (40.5)                       | 289 (43.5)                    | 127 (34.9)                        | 8.6             | 2.5, 14.8                | 0.01    |
| Birth weight z-score, mean (SD)               | -0.4 (1.1)                  | -0.4 (1.0)                       | -0.3 (1.1)                    | -0.5 (1.0)                        | 0.2             | 0, 0.3                   | 0.02    |
| Male, N (%)                                   | 572 (52.0)                  | 528 (51.4)                       | 356 (53.6)                    | 172 (47.3)                        | -6.4            | -12.7, 0.0               | 0.05    |
| 5 min Apgar score, median (IQR):              | 8 (7, 9)<br>N=1092          | 8 (7, 9)<br>N=1021               | 8 (7, 9)<br>N=663             | 8 (7, 9)<br>N=358                 |                 | 0.0, 0.0                 |         |
| Age at enrolment, mean (SD) days              | 2.0 (0.9)                   | 2.0 (0.9)                        | 2.0 (0.9)                     | 2.0 (0.8)                         | 0               | -0.1, 0.2                | 0.45    |
| Age commenced study powder, median (IQR) days | 5.0 (4.0-7.0)<br>N=1071     | 5.0 (4.0-7.0)<br>N=1018          | 5.0 (4.0-7.0)<br>N=662        | 4.0 (3.0-6.0)<br>N=358            | 1.0             | 0.7, 1.3                 | <0.005  |
| <b>Neonatal morbidity</b>                     |                             |                                  |                               |                                   |                 |                          |         |
| NEC (Bell Stage 2 or more), n (%)             | 35 (3.2)                    | 17 (1.7)                         | 11 (1.7)                      | 6 (1.6)                           | 0.0             | -1.6, 1.6                | 0.99    |

|                                                           |                      |            |            |           |      |            |      |
|-----------------------------------------------------------|----------------------|------------|------------|-----------|------|------------|------|
| IVH Grade 3 or 4 or cystic PVL, n (%)                     | 38 (3.5)             | 24 (2.3)   | 13 (2.0)   | 11 (3.0)  | -1.1 | -3.0, 1.0  | 0.28 |
| At least one episode of definite late-onset sepsis, n (%) | 161 (14.6)           | 136 (13.2) | 87 (13.1)  | 49 (13.5) | -0.4 | -4.7, 4.0  | 0.87 |
| BPD at 36 weeks CA, n (%)                                 | 326 (29.7)<br>N=1047 | 312 (30.4) | 213 (32.1) | 99 (27.2) | 4.9  | -0.9, 10.0 | 0.10 |
| ROP ≥grade 3, n (%)                                       | 58 (5.3)             | 58 (5.6)   | 35 (5.3)   | 23 (6.3)  | -1.0 | -4.1, 2.0  | 0.49 |

Abbreviations: N, number; %, percentage; SD, standard deviation; IQR, Interquartile Range (25, 75); g, grams; NEC, necrotizing enterocolitis; IVH, intraventricular hemorrhage; PVL, periventricular leukomalacia, BPD, Bronchopulmonary dysplasia; ROP, Retinopathy of prematurity.

**Supplemental Table 2: Baseline characteristics of 664 participants assessed at 2-5 years corrected gestational age**

|                                                           | Probiotic group<br>(N=337) | Placebo group<br>(N=327) |
|-----------------------------------------------------------|----------------------------|--------------------------|
| <b><i>Perinatal Characteristics</i></b>                   |                            |                          |
| Multiple births, N (%)                                    | 130 (38.6)                 | 118 (36.1)               |
| Antenatal steroids (any), N (%)                           | 311 (92.3)                 | 299 (91.4)               |
| Maternal antibiotics, N (%)                               | 164 (48.7)                 | 156 (47.7)               |
| Maternal infection (chorioamnionitis), N (%)              | 25 (7.4)                   | 28 (8.6)                 |
| Cesarean section delivery, N (%)                          | 222 (65.9)                 | 230 (70.3)               |
| Gestational age, mean (SD) weeks                          | 27.8 (2.0)                 | 27.8 (1.9)               |
| < 28 weeks, N (%)                                         | 133 (39.5)                 | 143 (43.7)               |
| Birth weight, mean (SD) g                                 | 1068 (259)                 | 1050 (254)               |
| < 1000g, N (%)                                            | 147 (43.6)                 | 142 (43.4)               |
| Birth weight z-score, mean (SD)                           | -0.3 (1.1)                 | -0.3 (1.1)               |
| Male, N (%)                                               | 173 (51.3)                 | 183 (56.0)               |
| 5 min Apgar score, median (IQR):                          | 8 (7-9)<br>N=335           | 8 (7-9)<br>N=323         |
| Age at enrolment, mean (SD) days                          | 2.0 (0.9)                  | 2.1 (0.9)                |
| Age commenced study powder, median (IQR) days             | 5.0 (4.0-6.0)<br>N=335     | 5.0 (4.0-7.0)<br>N=325   |
| <b><i>Neonatal characteristics</i></b>                    |                            |                          |
| Any EBM, n (%)                                            | 327 (97.0)                 | 324 (99.1)               |
| NEC (Bell Stage 2 or more), n (%)                         | 3 (0.9)                    | 8 (2.4)                  |
| IVH Grade 3 or 4 or cystic PVL, n (%)                     | 7 (2.1)                    | 6 (1.8)                  |
| At least one episode of definite late-onset sepsis, n (%) | 45 (13.4)                  | 42 (12.8)                |
| BPD at 36 weeks, n (%)                                    | 110 (32.6)                 | 103 (31.5)               |
| ROP ≥grade 3, n (%)                                       | 18 (5.3)                   | 17 (5.2)                 |

Abbreviations: N, number; %, percentage; SD, standard deviation; IQR, Interquartile Range (25, 75); g, grams; NEC, necrotizing enterocolitis; IVH, intraventricular hemorrhage; PVL, periventricular leukomalacia; BPD, Bronchopulmonary dysplasia; ROP, Retinopathy of prematurity

**Supplemental Table 3: Adjusted relative risks, survival without major neurosensory impairment, probiotic vs placebo**

| Group               | Adjustment variables |                          |                      |                                                                                                                                                                               | Relative Risk (95%CI) | P value |
|---------------------|----------------------|--------------------------|----------------------|-------------------------------------------------------------------------------------------------------------------------------------------------------------------------------|-----------------------|---------|
|                     | Gender               | Gestational age at birth | Birth-weight z-score | (i) IVH Grade 3 or 4 or cystic PVL<br>(ii) BPD at 36 weeks<br>(iii) ROP ≥grade 3<br>(iv) At least one episode of definite late-onset sepsis and/or NEC (Bell Stage 2 or more) |                       |         |
| Total group         |                      |                          |                      |                                                                                                                                                                               | 1.01 (0.93 to 1.09)   | 0.88    |
|                     | ✓                    | ✓                        | ✓                    |                                                                                                                                                                               | 0.99 (0.92 to 1.06)   | 0.70    |
|                     | ✓                    | ✓                        | ✓                    | ✓                                                                                                                                                                             | 0.99 (0.93 to 1.06)   | 0.76    |
| Gestation ≥28 wk    |                      |                          |                      |                                                                                                                                                                               | 1.06 (0.97 to 1.16)   | 0.19    |
|                     | ✓                    |                          | ✓                    |                                                                                                                                                                               | 1.05 (0.96 to 1.14)   | 0.31    |
|                     | ✓                    |                          | ✓                    | ✓                                                                                                                                                                             | 1.04 (0.96 to 1.13)   | 0.34    |
| Gestation <28 wk    |                      |                          |                      |                                                                                                                                                                               | 0.91 (0.78 to 1.07)   | 0.25    |
|                     | ✓                    |                          | ✓                    |                                                                                                                                                                               | 0.90 (0.78 to 1.05)   | 0.18    |
|                     | ✓                    |                          | ✓                    | ✓                                                                                                                                                                             | 0.92 (0.82 to 1.04)   | 0.18    |
| Birth weight ≥1000g |                      |                          |                      |                                                                                                                                                                               | 1.02 (0.94 to 1.12)   | 0.62    |
|                     | ✓                    | ✓                        |                      |                                                                                                                                                                               | 1.01 (0.92 to 1.10)   | 0.88    |
|                     | ✓                    | ✓                        |                      | ✓                                                                                                                                                                             | 1.01 (0.93 to 1.09)   | 0.88    |
| Birth weight <1000g |                      |                          |                      |                                                                                                                                                                               | 0.99 (0.85 to 1.15)   | 0.85    |
|                     | ✓                    | ✓                        |                      |                                                                                                                                                                               | 0.98 (0.85 to 1.13)   | 0.80    |
|                     | ✓                    | ✓                        |                      | ✓                                                                                                                                                                             | 0.98 (0.87 to 1.10)   | 0.70    |

Abbreviations: g, grams; wk, weeks; NEC, necrotizing enterocolitis; IVH, intraventricular hemorrhage; PVL, periventricular leukomalacia; BPD, Bronchopulmonary dysplasia; ROP, Retinopathy of prematurity
